1 **Highly accelerated rates of heritable large-scale mutations under prolonged**  
2 **exposure to a metal mixture of copper and nickel**

3 Frédéric J.J. Chain<sup>1,2\*</sup>, Jullien M. Flynn<sup>1,3</sup>, James K. Bull<sup>1</sup>, and Melania E. Cristescu<sup>1</sup>

4  
5 <sup>1</sup>*Department of Biology, McGill University, 1205 Docteur Penfield, Montréal, Québec,*  
6 *H3A 1B1, Canada*

7 <sup>2</sup>*Current address: Department of Biological Sciences, University of Massachusetts*  
8 *Lowell, 1 University Ave., Lowell MA, USA, 01854.*

9 <sup>3</sup>*Current address: Department of Molecular Biology and Genetics, Cornell University,*  
10 *526 Campus Rd., Ithaca NY, USA, 14853*

11  
12 \*Corresponding author:

13  
14 Frédéric Chain  
15 Department of Biological Sciences  
16 University of Massachusetts Lowell  
17 One University Ave.  
18 Lowell MA, USA 01854  
19 (978) 934-2873  
20 Frederic\_Chain@uml.edu  
21

22  
23

24 **Running Title:** Metals increase rate of deletions and duplications

25  
26 **Key-words:** copy-number variation, CNV, structural variation, duplication, deletion,  
27 mutation accumulation lines, nonhomologous end-joining, environmental stress,  
28 *Daphnia*

29

## 30 **Abstract**

31 Mutation rate variation has been under intense investigation for decades. Despite  
32 these efforts, little is known about the extent to which environmental stressors  
33 accelerate mutation rates and influence the genetic load of populations. Moreover, most  
34 studies have focused on point mutations rather than large-scale deletions and  
35 duplications (copy number variations or “CNVs”). We estimated mutation rates in  
36 *Daphnia pulex* exposed to low levels of environmental stressors as well as the effect of  
37 selection on *de novo* mutations. We conducted a mutation accumulation (MA)  
38 experiment in which selection was minimized, coupled with an experiment in which a  
39 population was propagated under competitive conditions in a benign environment. After  
40 an average of 103 generations of MA propagation, we sequenced 60 genomes and  
41 found significantly accelerated rates of deletions and duplications in MA lines exposed  
42 to ecologically relevant concentrations of metals. Whereas control lines had gene  
43 deletion and duplication rates comparable to other multicellular eukaryotes ( $1.8 \times 10^{-6}$   
44 per gene per generation), a mixture of nickel and copper increased rates fourfold. The  
45 realized mutation rate under selection was reduced to 0.4x that of control MA lines,  
46 providing evidence that CNVs contribute to mutational load. Our CNV breakpoint  
47 analysis revealed that nonhomologous recombination associated with regions of DNA  
48 fragility is the primary source of CNVs, plausibly linking metal-induced DNA strand  
49 breaks with higher CNV rates. Our findings suggest that environmental stress, in  
50 particular multiple stressors, can have profound effects on large-scale mutation rates  
51 and mutational load of populations.

52

## 53 **Introduction**

54 Germ-line mutations provide the raw material for evolutionary change, but also  
55 the genetic variation associated with heritable diseases. Because spontaneous  
56 mutations are more often harmful or neutral than beneficial, the accumulation of  
57 mutations in the genome has important fitness consequences (Baer et al. 2007; Lynch  
58 2010). The frequency at which mutations are generated, as well as the environmental  
59 triggers and selective forces influencing mutation rates are therefore fundamental to  
60 biology. Accurately measuring the mutation rate, however, poses a considerable

61 challenge due to the infrequent nature of mutations and the action of natural selection,  
62 which eliminates many deleterious mutations to bias the sample of observed mutations.  
63 Mutation accumulation (MA) experiments have been particularly effective for directly  
64 measuring mutation rates because repeated bottlenecks reduce the effect of selection,  
65 allowing all but the most deleterious mutations to accrue over multiple generations  
66 (Halligan and Keightley 2009). The comparison of MA experiments with a population  
67 experiencing selection can then be used to infer the fitness consequences of new  
68 mutations and their contribution to mutational load, ideally by using large populations  
69 started with organisms of the same genetic background to eliminate the impact of  
70 genotype on mutation rates (Baer et al. 2005; Ness et al. 2015). Studies that conduct  
71 whole genome sequencing of MA lines have begun to evaluate the extent to which  
72 mutation rates vary across taxa and within species (Schridder et al. 2013; Ness et al. 2015),  
73 but few have compared these rates with a population under selection, let alone using  
74 the same genetic lineage for this comparison (but see (Flynn et al. 2017)). Furthermore,  
75 empirical evidence on the factors underlying mutation rate variation is limited relative to  
76 our theoretical understanding (Baer et al. 2007), including the contribution of different  
77 environmental conditions, and the long term effects of highly mutagenic environments  
78 (Lynch 2016).

79 The rate of mutations depends on a combination of factors including the amount  
80 of DNA damage and the efficacy of the DNA repair machinery, which can both vary  
81 under different genetic conditions and environments (Baer et al. 2007; Sharp and Agrawal  
82 2016). DNA damage can be repaired using a multitude of alternative DNA damage  
83 response pathways, some of which are more error-prone than others. For example, the  
84 two main competing pathways for repairing DNA double strand breaks are homologous  
85 recombination (HR) that uses a copy from a homologous template, and a more error-  
86 prone nonhomologous recombination (NHR) process called nonhomologous end-joining  
87 (NHEJ) that ligates the ends of broken DNA (Ciccia and Elledge 2010; Lam et al. 2010;  
88 Carvalho and Lupski 2016). Errors occurring during DNA repair not only contribute to point  
89 mutations but are also important sources of copy-number variations (CNVs) – large  
90 deletions, duplications and insertions – which can encompass genes and have relevant  
91 consequences in cancer and human genetic diseases (Helleday et al. 2014; Sudmant et al.

92 2015; Carvalho and Lupski 2016). A high propensity for DNA damage or for error-prone  
93 repair pathways is therefore likely to elevate mutation rates. Whether these factors are  
94 influenced by environmental stressors such as metals to result in higher mutation rates  
95 remains largely unknown.

96 It is established that various exogenous and endogenous stresses induce both  
97 DNA breaks and somatic mutations. However, experimental fitness assays have  
98 provided indirect and contradictory findings concerning the effects of stress on the  
99 accumulation of germ-line mutations (e.g. (Goho and Bell 2000; Joyner-Matos et al. 2011)).  
100 Moreover, very few genetic studies have directly investigated the heritable  
101 consequences of environmental stresses on the rate of mutations across generations,  
102 particularly among multicellular organisms. For example, genetic screens of tandem  
103 repeats in either eukaryotic germ-lines or in parents and their offspring have revealed  
104 elevated mutation rates upon exposure to air pollution, tobacco smoke, and metals  
105 (Somers et al. 2002; Rogstad et al. 2003; Marchetti et al. 2011). Similarly, higher frequencies  
106 of CNVs and indels were reported in offspring after parent irradiation (Adewoye et al.  
107 2015). Even scarcer are genomic approaches that utilize MA experiments to assess the  
108 variation in mutation rates across environments after multiple generations. MA  
109 experiments have revealed that a stressful high temperature increased the rate of short  
110 tandem repeats in *Caenorhabditis elegans* measured after 100 generations (Matsuba et  
111 al. 2013), and that *Arabidopsis thaliana* grown under salinity stress accumulated about  
112 twice as many short insertions and deletions (INDELs) than control lines after only 10  
113 generations (Jiang et al. 2014). However, only one of these past studies surveyed CNVs,  
114 which have distinct mutational mechanisms (Lam et al. 2010) that could be more readily  
115 induced by stress. It remains unclear whether CNV rates over multiple generations differ  
116 across environments and whether they contribute to mutational load.

117 In this study, we directly estimate genome-wide mutation rates including point  
118 mutations, INDELs, and large-scale duplications and deletions under metal stressors in  
119 *Daphnia*. This is the first study to estimate large-scale mutation rates under different  
120 environmental conditions and under contrasting selection regimes using a single genetic  
121 background. Our approach combines two long-term experiments seeded with the same  
122 ancestral *Daphnia* lineage: one MA experiment in which selection was minimized and

123 one non-MA population under selection maintained for the entire duration of the MA  
124 experiment. This unique design allowed us to directly infer the selective effects on  
125 mutations. Additionally, we perform a sequence analysis at mutational breakpoints to  
126 inform on the potential source of large-scale mutations and the causes of rate variation  
127 across environmental conditions.

128

## 129 Results

### 130 Mutation accumulation after 100 generations

131 We sequenced 60 *Daphnia pulex* genomes including 9 MA lines exposed to  
132 copper (Cu), 9 MA lines exposed to nickel (Ni), 9 MA lines exposed to a mixture of  
133 nickel and copper (NiCu), 24 MA lines maintained in controlled benign conditions (Con),  
134 and 9 non-MA isolates randomly chosen from a population evolving under selection in  
135 benign conditions for the same duration as the MA experiment (Figure 1).

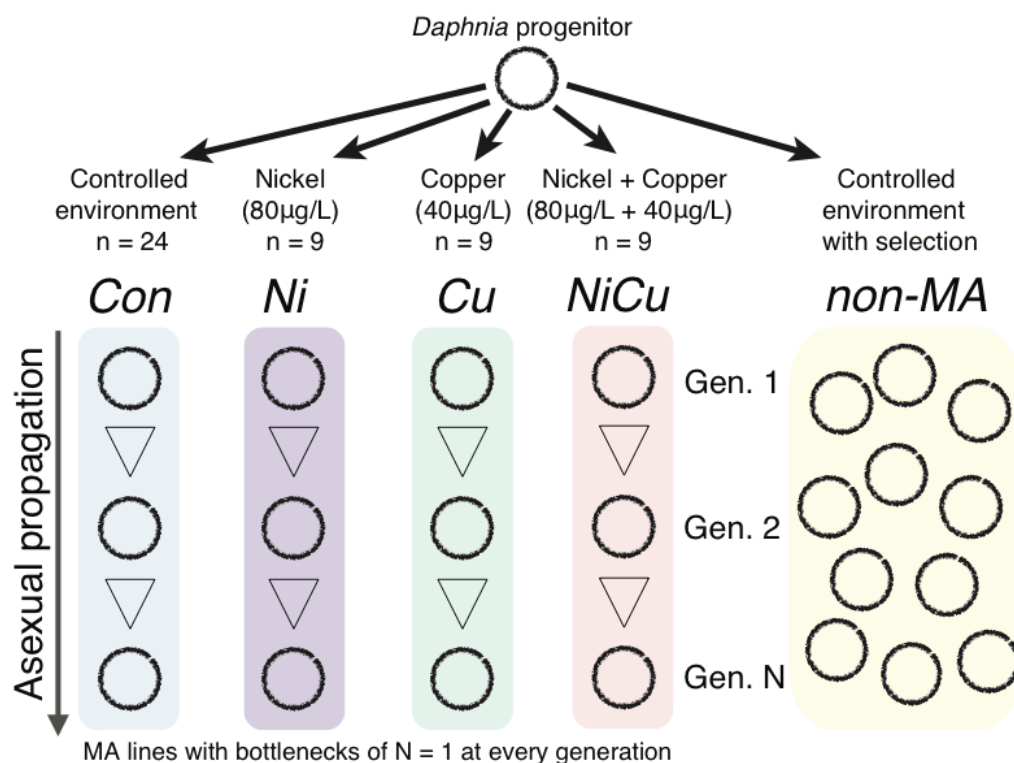

**Figure 1. Experimental design.** An obligate parthenogenetic *Daphnia pulex* progenitor was used to seed both a mutation accumulation (MA) experiment propagated in four different environments for an average of 103 generations as well as a non-MA population with selection and competition.

136 The consensus genotype of all MA lines was used to infer the genotype of their  
 137 common ancestor and the mutations accumulated in each sample. Mutation filtering  
 138 was calibrated to reduce false positives based on the validation of randomly selected  
 139 variant calls using PCR and Sanger sequencing (see Methods). After filtering, we  
 140 detected a total of 916 *de novo* single nucleotide mutations and small (1-50 bp) INDELs,  
 141 as well as 776 deletions and 406 duplications larger than 500bp (Figure 2;  
 142 Supplemental Tables S1 and S2). Duplications typically doubled the locus copy number,  
 143 whereas deletions typically had half the number of reads (Supplemental Figure S1).  
 144 Genomes with more deletions tended to have more duplications (Pearson's  $R = 0.57$ ,  $p$   
 145  $< 0.001$ ), but the number and total length of CNVs per genome were not associated with  
 146 overall depth of coverage ( $R^2 = 0.03$ ,  $p = 0.09$  and  $R^2 = 0.02$ ,  $p = 0.12$ , respectively).  
 147 Further, increasing the coverage of two randomly selected MA lines (C01 and C35) did  
 148 not affect the detection of CNVs.

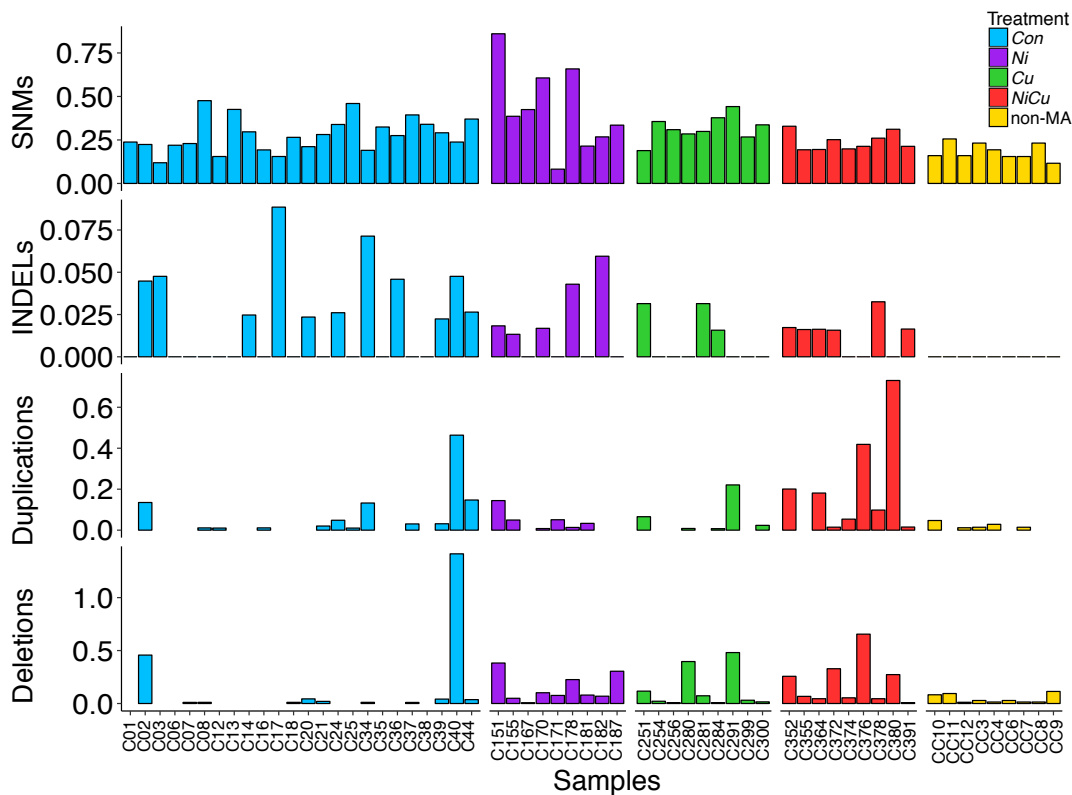

**Figure 2. Number of mutations per 100 Mbp per generation detected in each genome.** Mutations include single nucleotide mutations (SNMs), small (<50 bp) insertions and deletions (INDELs), and large-scale (>500 bp) duplications and deletions. The number of generations used for non-MA isolates was inferred from a life history experiment.

149 A total of 243 deletions and 130 duplications overlapped single-copy genes,  
150 giving rise to a total of 300 “gene CNVs”, including 180 gene deletions and 139 gene  
151 duplications. In addition, there were 177 “partial gene CNVs” that included 136 partially  
152 deleted genes and 50 partially duplicated genes (Figure 3; Supplemental Table S3).  
153 Many multi-copy genes were found among CNVs, but these were excluded from our  
154 gene CNV analysis to limit biases from reads mapping to multiple genomic positions  
155 due to the highly duplicated nature of the reference genome (Colbourne et al. 2011; Keith  
156 et al. 2016).  
157

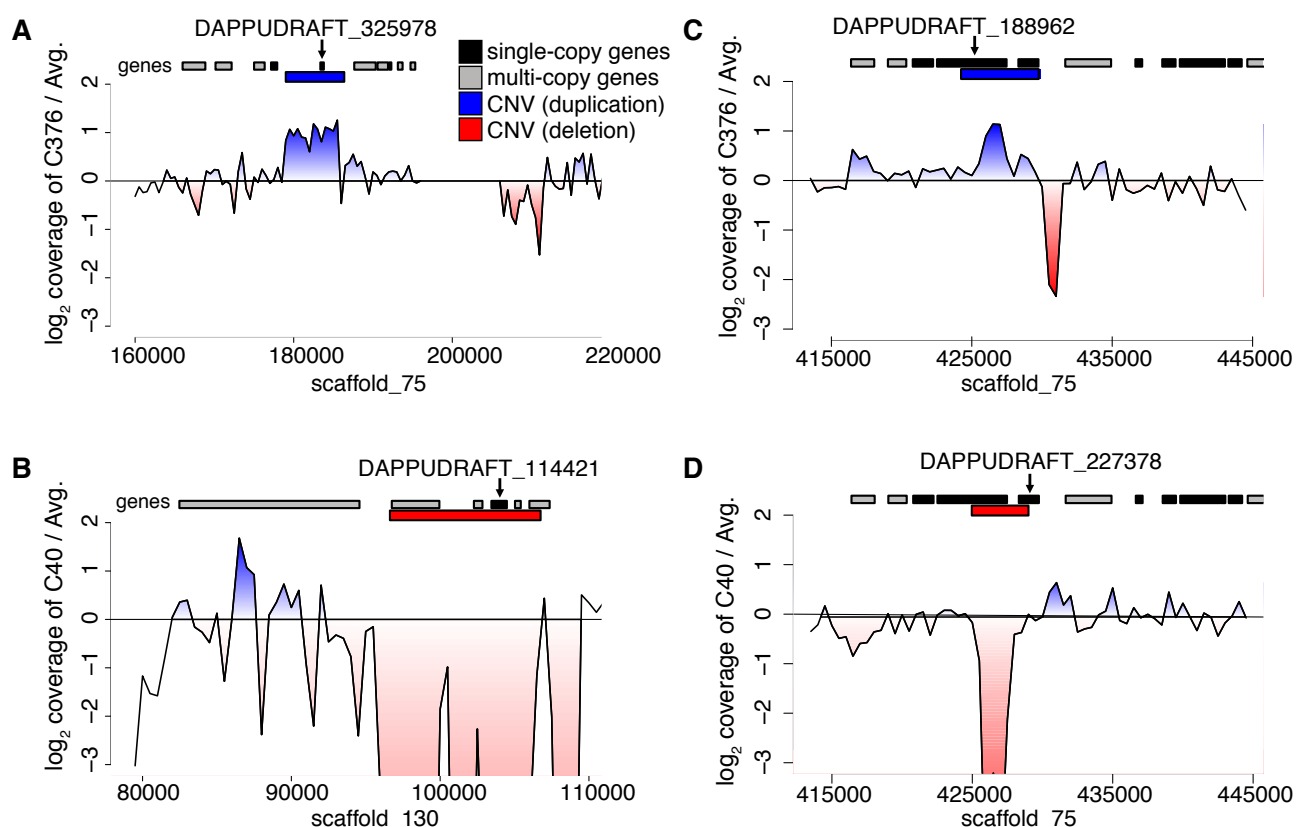

**Figure 3. Relative read depth at four CNV loci.** Read depth (log<sub>2</sub> coverage) between genomes with a large-scale mutation (genomic deletions and duplications) and the average of all other MA lines is shown, where a ratio above zero (blue) indicates the focal genome has more coverage than average, and a ratio below zero (red) indicates the focal genome has less coverage. (A) Duplication in the *NiCu* line C376 overlapping an uncharacterized single-copy gene (DAPPUDRAFT\_325978). (B) Deletion in *Con* line C40 overlapping an uncharacterized single-copy gene (DAPPUDRAFT\_114421) and several multiple-copy genes. (C) A duplication in C376 and (D) a deletion in C40 that lead to a partial gene CNV in the *mre11* gene (DAPPUDRAFT\_188962) and a neighboring uncharacterized gene (DAPPUDRAFT\_227378).

158 *Metal stress can increase large-scale mutation rates*

159 A subset of MA lines in our experiment was exposed to metals (copper and  
160 nickel) that are prominent environmental stressors in aquatic habitats (Yan et al. 2016).  
161 Variation in the mutation rate can arise if cellular stressors due to metals perturb DNA  
162 replication, increase DNA damage, or alter DNA repair (Baer et al. 2007). The rates of  
163 single nucleotide mutations and INDELs as well as transition/transversion ratios were  
164 similar between *Con* lines and the average of all metal-exposed lines (Figure 4).  
165

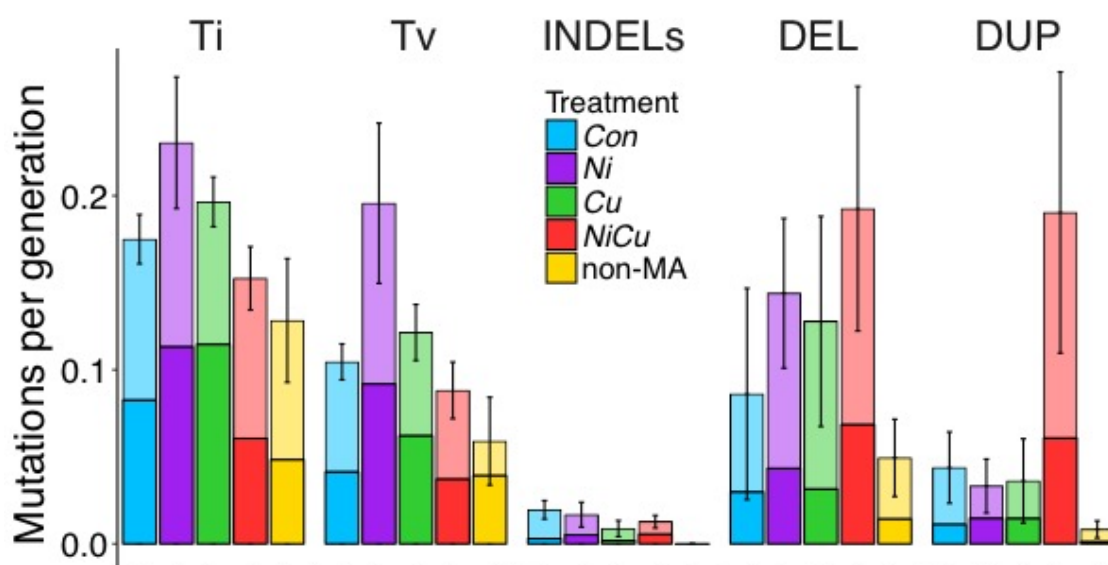

**Figure 4. Mean number of mutations per 100 Mbp per generation across treatments and experiments.** Stacked bars indicate whether the mutations overlap genes (solid / bottom) or not (transparent / top). Mutations include transitions (Ti), transversions (Tv), small (<50 bp) insertions and deletions (INDELs), and large-scale (>500 bp) deletions (DEL) and duplications (DUP). Standard error bars for each treatment are shown. The number of generations used for non-MA isolates was inferred from a life history experiment.

166 The highest rate of single nucleotide mutations was observed in lines exposed to  
167 nickel, but this was not significantly higher compared to *Con* lines. In contrast, two of the  
168 metal-exposed lines (*Ni* and *NiCu*) had significantly greater CNV rates than *Con* lines  
169 after Bonferroni correction; the average and standard error (SEM) of CNVs per genome  
170 per generation was 0.15 (SEM 0.09) for *Con* lines, whereas *Ni* lines had 1.4x higher  
171 rates with an average of 0.20 (SEM 0.06) per genome per generation (Mann-Whitney  $p$   
172 = 0.007), and *NiCu* lines experienced over 3.0x higher rates with an average rate of



173 0.43 (SEM 0.16; Mann-Whitney  $p = 0.002$ ). *Cu* lines had an average of 0.19 CNVs per  
 174 genome per generation, but this was not significantly higher than *Con* lines (Mann-  
 175 Whitney  $p = 0.069$ ). While deletion rates were significantly greater in each of the metal-  
 176 exposed lines compared to *Con* lines after Bonferroni correction (all with Mann-Whitney  
 177  $p < 0.01$ ), only the metal mixture *NiCu* had significantly higher duplication rates (Mann-  
 178 Whitney  $p < 0.01$ ). Controlling for the number of sites analyzed, the overall rates of  
 179 CNVs per called site per generation were  $6.5 \text{ (SEM } 4.1) \times 10^{-10}$  for *Con*,  $8.9 \text{ (SEM } 2.8)$   
 180  $\times 10^{-10}$  for *Ni*,  $8.2 \text{ (SEM } 4.2) \times 10^{-10}$  for *Cu*, and  $19.1 \text{ (SEM } 0.7) \times 10^{-10}$  for *NiCu*. The  
 181 elevated CNV rates observed in metal lines remained after accounting for sample size  
 182 differences across treatments using random permutations (Supplemental Figure S2).  
 183 CNV rates were not correlated with generation time (Pearson's  $R < 0.001$ ,  $p = 0.99$ ).  
 184

#### 185 *Extensive levels of gene deletions and duplications*

186 To investigate whether the effect of metal stress also extends to functional  
 187 regions of the genome, we evaluated the impact of CNVs on single-copy genes. As with  
 188 overall CNV rates, the rate of gene deletions and gene duplications (per gene per  
 189 generation) varied across samples and treatments (Table 1; Supplemental Table S1).  
 190

**Table 1:** Mean CNV, deletion (DEL) and duplication (DUP) rates  $\pm$  standard errors for the whole genome and for single-copy genes per generation are shown for each treatment. Rates include all genome-wide CNVs per generation, all gene CNVs including partially deleted and duplicated genes, and complete gene CNVs excluding partially duplicated and deleted genes. Rates for the non-MA isolates were calculated using conservative estimates of generations derived from a life history experiment.

|             | Genome-wide ( $\times 10^{-1}$ ) |               |               | Genes ( $\times 10^{-6}$ ) |               |               | Complete Genes ( $\times 10^{-6}$ ) |               |               |
|-------------|----------------------------------|---------------|---------------|----------------------------|---------------|---------------|-------------------------------------|---------------|---------------|
|             | CNVs                             | DEL           | DUP           | CNVs                       | DEL           | DUP           | CNVs                                | DEL           | DUP           |
| <i>Con</i>  | 1.5 $\pm$ 0.9                    | 1.0 $\pm$ 0.7 | 0.5 $\pm$ 0.2 | 3.1 $\pm$ 1.7              | 2.1 $\pm$ 1.4 | 0.9 $\pm$ 0.4 | 1.8 $\pm$ 1.0                       | 1.0 $\pm$ 0.7 | 0.8 $\pm$ 0.3 |
| <i>Ni</i>   | 2.0 $\pm$ 0.6                    | 1.6 $\pm$ 0.5 | 0.4 $\pm$ 0.2 | 5.9 $\pm$ 2.8              | 4.0 $\pm$ 2.1 | 1.8 $\pm$ 1.4 | 3.9 $\pm$ 2.0                       | 2.5 $\pm$ 1.5 | 1.5 $\pm$ 1.1 |
| <i>Cu</i>   | 1.9 $\pm$ 1.0                    | 1.4 $\pm$ 0.7 | 0.4 $\pm$ 0.3 | 3.8 $\pm$ 1.9              | 2.7 $\pm$ 1.3 | 1.1 $\pm$ 0.7 | 2.5 $\pm$ 1.3                       | 1.9 $\pm$ 1.0 | 0.6 $\pm$ 0.3 |
| <i>NiCu</i> | 4.3 $\pm$ 1.6                    | 2.2 $\pm$ 0.8 | 2.2 $\pm$ 1.0 | 12.4 $\pm$ 3.6             | 6.4 $\pm$ 2.4 | 6.0 $\pm$ 2.6 | 7.8 $\pm$ 2.5                       | 3.3 $\pm$ 1.4 | 4.5 $\pm$ 1.9 |
| non-MA      | 0.6 $\pm$ 0.2                    | 0.4 $\pm$ 0.2 | 0.1 $\pm$ 0.1 | 1.4 $\pm$ 1.2              | 1.1 $\pm$ 1.3 | 0.3 $\pm$ 0.2 | 1.3 $\pm$ 1.3                       | 1.1 $\pm$ 1.3 | 0.1 $\pm$ 0.2 |

191

192 The mean deletion and duplication rates overlapping genes (both partially and  
193 completely) in *Con* lines were  $2.1 (\text{SEM } 1.4) \times 10^{-6}$  and  $0.9 (\text{SEM } 0.4) \times 10^{-6}$ ,  
194 respectively. The combined rate amounts to  $3.1 (\text{SEM } 1.7) \times 10^{-6}$  CNVs per gene per  
195 generation. *Ni* lines had higher gene deletion ( $4.0 (\text{SEM } 2.1) \times 10^{-6}$ ) and gene  
196 duplication ( $1.8 (\text{SEM } 1.4) \times 10^{-6}$ ) rates, but these were not significant after Bonferonni  
197 correction. Similar results were found for *Cu* lines with a gene deletion rate of  $2.7 (\text{SEM}$   
198  $1.3) \times 10^{-6}$  and a gene duplication rate of  $1.1 (\text{SEM } 0.7) \times 10^{-6}$ . In contrast, *NiCu* lines  
199 had gene CNV rates four times higher than *Con* lines at  $12.4 \times 10^{-6}$  (Mann-Whitney  $p <$   
200  $0.001$ ), with a gene deletion rate almost threefold higher at  $6.4 (\text{SEM } 2.4) \times 10^{-6}$  and a  
201 gene duplication rate more than sixfold higher at  $6.0 (\text{SEM } 2.6) \times 10^{-6}$ . Even after taking  
202 the average of only the nine *Con* lines with the highest CNV rates, *NiCu* lines still had a  
203 higher mean.

204 CNVs do not always encompass entire gene sequences, giving rise to partial  
205 gene deletions and duplications as well as complete gene CNVs. After separating these  
206 two categories, we found that rates of partial gene CNVs were generally within one  
207 order of magnitude from the rates of complete gene CNVs (Supplemental Table S1),  
208 similar to what has been found in *D. melanogaster* and *C. elegans* (Lipinski et al. 2011;  
209 Schrider et al. 2013). Overall, partial gene CNVs exhibited the same general patterns as  
210 complete gene CNVs, with significantly higher rates in *NiCu* lines (Mann-Whitney  $p <$   
211  $0.001$ ; Supplemental Figure S3). When only considering complete gene CNVs, *Con*  
212 lines had an average rate of  $1.8 (\text{SEM } 1.0) \times 10^{-6}$ . This was not statistically different  
213 compared to both *Ni* lines at  $3.9 (\text{SEM } 2.0) \times 10^{-6}$  and *Cu* lines at  $2.5 (\text{SEM } 1.3) \times 10^{-6}$ .  
214 In contrast, the *NiCu* lines had rates 3 times higher than *Con* lines ( $7.8 \times 10^{-6}$ ; Mann-  
215 Whitney  $p = 0.023$ ). These results indicate that chronic exposure to low levels of a metal  
216 mixture can substantially increase the rate at which large-scale heritable mutations arise  
217 in genomes and affect genes.

218  
219 *CNV breakpoint analysis suggests a preponderance of error-prone double strand break*  
220 *repair*

221 Whole genome sequencing enables nucleotide-resolution breakpoint analysis,  
222 which uses sequence information surrounding the start and end of CNVs to infer the

223 mechanism of mutation formation such as nonallelic homologous recombination  
224 (NAHR) and nonhomologous recombination (NHR) (Lam et al. 2010). Using this  
225 approach, we found that almost every deletion (96%) was associated with the CNV  
226 formation mechanism of NHR (Supplemental Table S2). NHR consists of error-prone  
227 pathways of DNA break repair such as nonhomologous end-joining (NHEJ), and its  
228 predominance in *Daphnia* is more pronounced than what has been found in humans  
229 (Lam et al. 2010), but similar to findings in *Drosophila* (Cardoso-Moreira et al. 2012; Zichner  
230 et al. 2013). Almost half (49%) of the NHR events displayed short regions of DNA  
231 sequence homology (microhomology stretches), which is more frequent than expected  
232 based on random permutations ( $p = 0.002$ ) and is a characteristic feature of NHR (Lam  
233 et al. 2010). We found that NHR events tended to have high DNA flexibility, with  
234 significantly lower helix stability (Mann-Whitney  $p = 0.018$ ) and lower GC content  
235 (Mann-Whitney  $p = 0.016$ ) compared to other formation mechanisms (Supplemental  
236 Figure S4). This is in line with previous findings in humans, suggesting that NHR  
237 mechanisms such as NHEJ are often associated with fragile genomic regions  
238 susceptible to double strand breaks (Lam et al. 2010). Most CNVs overlapping in multiple  
239 MA lines have different breakpoints (50-83%) suggesting independent recurrent CNVs  
240 that could represent deletion hotspots such as those previously reported in *Daphnia* (Xu  
241 et al. 2011). We found no significant differences in CNV formation mechanisms between  
242 *Con* lines and any of the metal treatments. Interestingly though, the two MA lines with  
243 the highest rates of CNVs (*Con*-C40 and *NiCu*-C376) had a CNV overlapping the *mre11*  
244 gene (Figure 3; Supplemental Table S3), a key player in DNA damage response and  
245 double strand break repair. The expression level of this gene has important  
246 consequences on the choice of DNA repair pathway and its efficiency (Rass et al. 2009).  
247 An unbalanced copy number of *mre11* could alter expression of the gene and reduce  
248 DNA repair fidelity, thereby increasing genomic CNV rates over time. We do not know,  
249 however, when the mutations to *mre11* occurred during the experiment.

250

### 251 *Selection against CNVs in non-MA isolates*

252 The elevated mutation rates detected among MA lines exposed to a mixture of  
253 metals reflect heritable mutations that arise in nearly selection-free conditions, whereas

254 purifying selection is expected to purge many new deleterious mutations. To evaluate  
255 the influence of selection on the rates and spectra of mutations in our experiment, we  
256 compared the MA lines with isolates from the population propagated under selection  
257 and seeded from the same original progenitor lineage. Given that *Con* MA lines and the  
258 non-MA population were propagated under identical environmental conditions, the  
259 underlying rate of mutation was expected to be the same, while the amount of mutations  
260 accumulated would differ due to selection. Over the same period of time as the MA  
261 experiment, the non-MA isolates accumulated 60% fewer mutations than *Con* lines,  
262 both in terms of small-scale mutations and CNVs (Supplemental Table S1). In contrast  
263 to MA lines that have each acquired mutations independently, there were three single-  
264 nucleotide mutations and two deletions detected in multiple non-MA isolates shared by  
265 descent. However, no mutations (point mutations or large-scale mutations) were shared  
266 in all isolates, suggesting that their last common ancestor is the original progenitor from  
267 the start of our experiment (Supplemental Figure S5). Accounting for the shared  
268 mutations among lineages and their genealogy, the average number of accumulated  
269 single-nucleotide mutations and CNVs in the non-MA population was three times lower  
270 than the average of MA lines. To achieve the same rate of CNVs as in *Con* MA lines,  
271 the non-MA isolates would need to have still been at generation 26 by the time *Con*  
272 lines had already reached generation 100 (Figure 5A). This very low propagation rate is  
273 however highly unlikely given that we found no difference between non-MA isolates and  
274 *Con* MA lines in either lifespan (mean of 46 days versus 43 days;  $t(14.6) = 1.69$ ,  $p =$   
275  $0.11$ ) or age of first reproduction (mean of 11.5 days versus 11.5 days;  $t(14.7) = 0.18$ ,  $p$   
276  $= 0.86$ ). Based on mean lifespan and age of first reproduction measured in life history  
277 experiments, we calculated that the average non-MA isolate would have reached  
278 between 62 and 75 generations, with the slowest lineage at generation 30  
279 (Supplemental Methods). Late reproduction was assigned more weight in calculating  
280 generation time, which would underestimate the number of generations if selection  
281 favored faster reproduction in the population. Nevertheless, an estimate of 62  
282 generations still gives a mean realized rate of CNVs at least twice as low as MA lines  
283 (Table 1). Selection removing spontaneous CNVs and single nucleotide mutations is  
284 likely responsible for the lower incidence observed among non-MA isolates, as well as

285 the lower variance observed across independent non-MA lineages compared to MA  
286 lines (Supplemental Table S1).

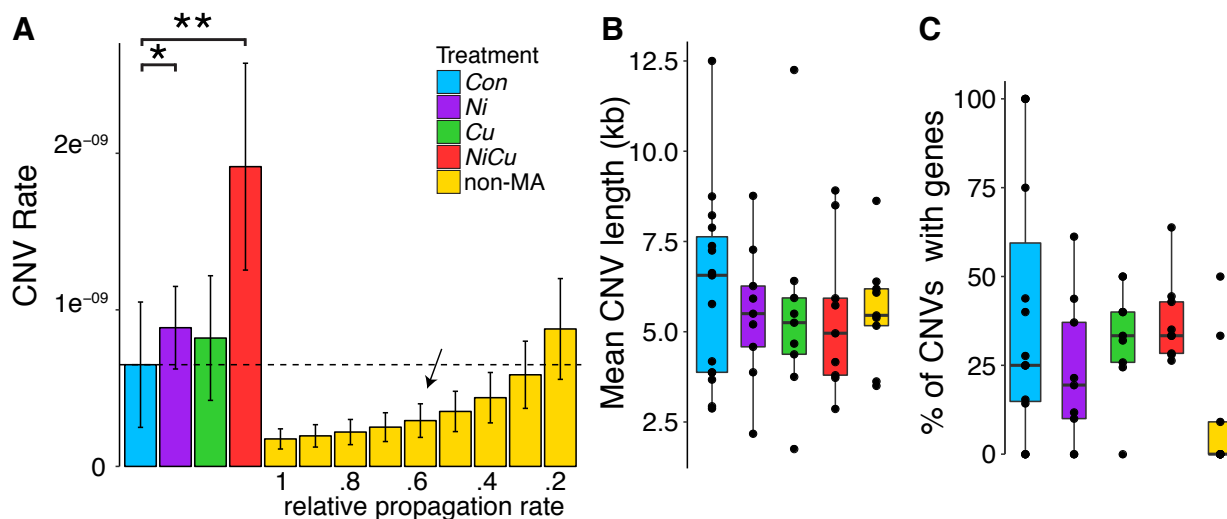

**Figure 5. CNV rates and lengths, with and without selection.** (A) Mean CNV rates (per nucleotide per generation) and standard errors among MA treatment groups showing significant differences among treatments (\* for  $p < 0.01$ , \*\* for  $p < 0.005$ ). A comparison with non-MA isolates given various relative propagation rates compared to MA lines is shown, with a dotted line indicating the relative propagation rate in non-MA genomes to reach the same mutation rates as in control MA lines. We estimated the relative propagation rate based on a life history experiment (indicated with an arrow). (B) Boxplot of CNV length distributions across treatments. (C) The percentage length of CNV regions that overlap genes, in which only a single non-MA isolate has genes deleted, and two more isolates had a gene duplication.

287 Given the uncertainty of the exact generation numbers in the non-MA population,  
288 characteristics of CNVs intersecting functional regions were also used to evaluate  
289 whether isolates experienced selection. We found that the proportion of CNVs that  
290 overlap single-copy genes is at least three times lower in non-MA compared to MA  
291 genomes, whereas the mean length of CNVs was not different ( $p > 0.05$ ; Figures 5B  
292 and 5C). Furthermore, all but two gene CNVs were found in a single non-MA isolate  
293 (CC9) within a 100kb region deleting 7 single-copy genes (Supplemental Figure S6).  
294 Finally, there was a single partial CNV gene among non-MA genomes, while MA lines  
295 had rates of partial gene CNVs comparable to rates of complete gene CNVs  
296 (Supplemental Table 1; Supplemental Figure S3). These findings reveal a very low  
297 realized mutation rate affecting genes and the apparent efficiency of selection under

298 constant benign conditions, suggesting that the elevated mutation rates induced by  
299 stress increase mutation burden.

300

## 301 **Discussion**

302 *Comparable rates of gene deletion and duplication across organisms in benign*  
303 *conditions*

304 The rates of gene deletion and duplication that we calculated using 24 MA lines  
305 of *Daphnia pulex* ( $3.1 \times 10^{-6}$ , or  $1.8 \times 10^{-6}$  for complete gene CNVs) are within an order  
306 of magnitude of those calculated using 8 MA lines of *S. cerevisiae* ( $5.5 \times 10^{-6}$ ) (Lynch et  
307 al. 2008), 10 MA lines of *C. elegans* ( $3.4 \times 10^{-7}$ ) (Lipinski et al. 2011) and 8 MA lines of *D.*  
308 *melanogaster* ( $1.1 \times 10^{-6}$ ) (Schridder et al. 2013). Our rate is however much lower than a  
309 recent estimate using a similar approach and the same CNV detection software in 7  
310 total MA lines derived from two different genetic backgrounds of *D. pulex* ( $5.4 \times 10^{-5}$ )  
311 (Keith et al. 2016). This difference could be partially due to the different sample sizes  
312 analyzed since we found a negative association between the number of CNVs detected  
313 and the number of genomes included in the analysis (Supplemental Figure S7). Using  
314 permutations to randomly sample the same number of genomes used in Keith *et al.*  
315 (2016), we reached a similar rate of  $1.2 \times 10^{-5}$  gene CNVs for single-copy genes among  
316 *Con* lines. However, our PCR validations confirmed the presence of false positives  
317 when analysis was performed on only a subset of our samples rather than our full  
318 dataset (Supplemental Table S4). The lower mutation rate estimate based on the full  
319 dataset is more similar to estimates from other model organisms and appears to be less  
320 susceptible to false positives in our data, although Keith *et al.* (2016) also had high  
321 validation rates for their dataset. Another difference between the two studies that could  
322 contribute to the different rates is the depth of coverage, although we found that CNV  
323 detection was not correlated with sequencing depth and that average CNV rates were  
324 unaffected after doubling the coverage of two randomly chosen MA lines. Importantly  
325 though, our study focuses on the relative mutation rates among treatments of a single  
326 genetic background, and the rate of CNVs under a metal mixture (*NiCu*) remains higher  
327 than *Con* lines regardless of the number of samples included in our analysis (either 5,  
328 10, 20, 30 or 40 samples).

329

### 330 *Effects of multiple stressors on mutation rates*

331 Multiple stressors such as metal mixtures can have different biological impacts  
332 than individual stressors, due to complex interactions (Altshuler et al. 2011; Langie et al.  
333 2015). Here we show that the combined mixture of nickel and copper led to the highest  
334 CNV mutation rate in our experiment compared to controls, tripling rates of CNVs and  
335 quadrupling rates of gene CNVs, whereas Cu and Ni alone had a moderate to no  
336 measurable effects. This outcome is not necessarily due to the particular mixture *per se*;  
337 the *NiCu* treatment had an overall greater concentration of metals than either of the  
338 single metals alone, possibly exceeding a critical dose-response threshold. However,  
339 the similar rates of small-scale mutations across treatments suggests that DNA  
340 replication error rates and/or base and excision repair pathways were comparatively  
341 unaffected by metal stress, at least in the germ-line. This is perhaps surprising given  
342 that cellular stress can induce somatic point mutations and metals can impair excision  
343 repair pathways (Langie et al. 2015). In plants, both small-scale and large-scale  
344 mutations show higher rates under environmental stress, but different stressors have  
345 different effects: whereas high levels of salinity doubles the heritable rate of short indels  
346 and transversions (Jiang et al. 2014), various other abiotic stresses preferentially affect  
347 homologous recombination frequency compared to point mutations and microsatellite  
348 instability both in somatic cells and through transgenerational changes (Yao and  
349 Kovalchuk 2011), plausibly contributing to stress-induced CNVs (DeBolt 2010). Despite  
350 the conserved DNA repair and recombination pathways across taxa as diverged as  
351 plants and humans, species-specific duplications or deletions of genes in these  
352 pathways could contribute to differences in the repair mechanisms employed in  
353 response to DNA damage (Singh et al. 2010).

354

### 355 *Genetic mechanisms underlying CNVs*

356 Given the particularly high proportion of CNVs associated with NHR across all  
357 treatments, we hypothesize that the elevated CNV rate under exposure to a metal  
358 mixture is caused by an increase in double strand breaks in the germ-line, leading to  
359 greater opportunities for recombination and DNA repair errors producing CNVs.

360 Environmental stressors have previously been linked to increases in germ-line DNA  
361 strand breaks that are potentially caused by an increase in reactive oxygen species due  
362 to stress (Yauk et al. 2008). Additionally, metals can increase the incidence of sequence  
363 insertions at repaired double strand break sites by nonhomologous end-joining (NHEJ),  
364 proposed to be caused by interference with enzymatic processes of the proteins  
365 involved in NHEJ (Morales et al. 2016). This combination of an increase in both strand  
366 breaks and DNA repair errors could explain the higher rates of CNVs when exposed to  
367 a mixture of *Ni* and *Cu*. Although homologous recombination (HR) also leads to repair  
368 errors (Rodgers and McVey 2016), organisms that primarily repair DNA via more error-  
369 prone mechanisms might be predisposed to greater CNV rate variation and amplified  
370 effects when faced with environmental stressors. We cannot rule out the possibility that  
371 nonallelic homologous recombination (NAHR) also contributes to differences in mutation  
372 rates because our study focused on genomic regions with single-copy genes, likely  
373 underestimating the full impact of NAHR, which is an important source of recurrent  
374 CNVs occurring in segmental duplications (Gu et al. 2008).

375 An alternative explanation for an increase in mutation rates is that environmental  
376 stressors alter DNA repair fidelity. For example, different metals and exposure doses  
377 have been shown to differentially modulate the way cells repair double strand breaks,  
378 alternating between HR and the more error-prone NHEJ, two competing repair  
379 pathways (Morales et al. 2016). Stressful conditions in general can cause a shift to error-  
380 prone double strand break repair (Ponder et al. 2005), and lower physiological condition  
381 has been shown to lead to more mutations via changes in DNA repair pathways with  
382 different fidelity (Wang and Agrawal 2012; Sharp and Agrawal 2016). Contrary to these  
383 previous findings, we did not observe differences in the mechanism of CNV formation  
384 among treatments, potentially because CNVs under benign conditions are already  
385 associated with error-prone pathways. Instead, our results suggest that a mixture of  
386 metals induces more frequent germ-line DNA strand breakage in *Daphnia*. This finding  
387 has important evolutionary consequences particularly in taxa that propagate asexually  
388 (either cyclically or obligately) like *Daphnia*. Previous studies conducted on *Daphnia*  
389 propagated asexually under benign conditions documented high rates of loss of  
390 heterozygosity (due to gene conversion, deletion, and ameiotic recombination) that can



391 contribute to decreasing overall fitness (Omilian et al. 2006; Xu et al. 2011; Keith et al. 2016;  
392 Flynn et al. 2017). Studying mutation rates in other organisms with different underlying  
393 genome architecture, propensity for mechanisms of DNA repair, and general levels of  
394 DNA repair fidelity would further illuminate the extent to which these genomic attributes  
395 either promote or dampen the mutagenic effects of metals in germ-lines.

396

## 397 **Conclusions**

398 Despite the increasing evidence for the considerable contribution of CNVs to  
399 genome evolution and genetic diseases, few eukaryotic studies have estimated the  
400 underlying rate of large-scale duplications and deletions. Our study reports for the first  
401 time to our knowledge the variation in genome-wide rates of CNVs under different  
402 environmental conditions, as well as under different selection regimes using the same  
403 genetic background. Our results illustrate that exposure to low but ecologically relevant  
404 levels of metal mixtures can accelerate rates of large-scale deletions and duplications,  
405 likely increasing mutational load and triggering deleterious phenotypic effects.

406 Sequence analyses at CNV breakpoints suggest that low levels of metals induce germ-  
407 line DNA strand breakage rather than modify DNA repair pathways used for resolving  
408 double strand breaks. Chronic exposure to low environmental stress might therefore  
409 have profound consequences on the frequency and type of variation generated in the  
410 genome, including duplicated and deleted genes, ultimately influencing the mutation  
411 burden and evolutionary trajectory of natural populations.

412

## 413 **Methods**

### 414 *Daphnia* mutation accumulation experiment

415 To assess mutation rate variation under different environmental conditions, we  
416 conducted a mutation accumulation (MA) experiment using a total of 51 independent  
417 lines of *Daphnia pulex* over an average of 103 generations (Figure 1). Twenty-four  
418 replicate MA lines were propagated in benign soft-water media as described in Flynn *et*  
419 *al.* (2017), herein labeled as MA controls (*Con*). In addition, nine nickel-exposed MA  
420 lines (*Ni*) were maintained in 80 µg/L of nickel, nine copper-exposed MA lines (*Cu*) were  
421 maintained in 40 µg/L of copper, and nine MA lines were maintained in a mixture of

422 nickel and copper (*NiCu*; 80 µg/L of nickel + 40 µg/L of copper). These sub-lethal  
423 concentrations of metals did not elicit a measurable differences in mortality, average  
424 brood size, or time to first clutch, and are comparable to *Daphnia* habitats that  
425 experienced decades of contamination of copper and nickel in the Sudbury Canada  
426 area (Yan et al. 2016). Each MA line was propagated using single progeny descendants  
427 every generation, and all were seeded with a single *Daphnia* obligate parthenogenetic  
428 progenitor. The ancestral progenitor for all MA lines was collected from Canard Pond  
429 (Lat. 42°12", Long. -82°98") in Windsor Ontario, Canada. All MA lines were maintained  
430 at 18°C with a humidity of 70% and a 12 hour light/dark cycle. MA lines were fed *ad*  
431 *libitum* with a mixture of algae (*Ankistrodesmus sp.*, *Scenedesmus sp.* and  
432 *Pseudokirchneriella sp.*). Backups for MA lines were maintained in case of mortality or  
433 sterility of the focal individual, and were used in ~6% of transfers with an average of  
434 once every 16 generations per line. Although this introduces some level of selection  
435 against lethal and sterility-causing mutations that could lead to underestimating  
436 mutation rates, the frequency of backup lines used across treatments was not  
437 significantly different.

438

#### 439 *Daphnia* population under selection

440 To evaluate the effect of selection on mutation rates, a large non-MA population  
441 seeded from the same ancestral progenitor as the MA lines was allowed to propagate  
442 without induced population bottlenecks for the duration of the MA experiment. Thus,  
443 whereas the MA lines experienced minimal selection, the non-MA population evolved  
444 with selection. The non-MA population was maintained in a 15 L tank under the same  
445 conditions as the *Con* MA lines with identical media, temperature and lighting  
446 conditions. Feeding was performed twice a week using the same mixture of algae as  
447 the MA lines. Six isolates were randomly chosen for sequencing when the *Con* MA lines  
448 had reached an average of 101 generations (1,368 days of propagation), and three  
449 additional isolates were sequenced after an average of 136 generations (1,642 days of  
450 propagation; see Supplemental Methods). The census size of the population at the  
451 earlier time point was estimated to be between 100 and 250 (Flynn et al. 2017). Although  
452 natural population size fluctuations probably occurred, the lack of fixed mutations (i.e.

453 shared across all non-MA isolates versus the ancestor) and the few shared mutations  
454 observed provides little evidence for severe population bottlenecks (Supplemental  
455 Figure S5). Future studies involving highly replicated non-MA populations would be  
456 needed to assess the extent of stochastic allele frequency variation among different  
457 populations.

458

#### 459 *Sample processing and sequencing*

460 Tissue collection, library preparation, and sequencing followed the  
461 approach described in Flynn *et al.* (2017). Tissue was collected from 3-5 clonal  
462 individuals per line raised in a sterile medium. During 48 hours prior to isolating DNA,  
463 animals were fed sterile Sephadex beads 10 times a day to eliminate food content from  
464 the gut, while being treated with antibiotics to reduce microbial contamination. DNA was  
465 extracted following the cetyltrimethylammonium bromide method (Doyle and Doyle 1987).  
466 DNA samples were quantified with PicoGreen Quant-IT and were diluted to 2.5 ng/μL.  
467 We adopted a library preparation protocol derived from the standard Illumina Nextera  
468 approach that was optimized to reduce the use of reagents (Baym *et al.* 2015). Samples  
469 were dual indexed (one index at the 3' end and another index at the 5' end) such that  
470 each sample had a unique index combination per sequencing lane. Libraries were  
471 cleaned and short products removed with Beckman Coulter AMPure XP beads.  
472 Libraries were then normalized, pooled into three groups, and run on a total of five lanes  
473 of Illumina HiSeq 100bp and 150bp paired end reads at Genome Quebec. Adapter  
474 sequences were removed and overlapping sequences merged from fastq files using  
475 SeqPrep (<https://github.com/jstjohn/SeqPrep>). For each of the sequencing lanes, reads  
476 were mapped against the *Daphnia pulex* reference genome (Colbourne *et al.* 2011) using  
477 the short read alignment tool BWA v0.7.10 (Li and Durbin 2009). After alignment, reads  
478 were cleaned and sorted, and duplicates were removed with Picard tools v1.123  
479 (<http://broadinstitute.github.io/picard>). Resulting BAM files were used for estimating  
480 depth of coverage, achieving an average of 13x coverage. Two randomly selected MA  
481 lines (C01 and C35) were intentionally sequenced to a higher depth to test the effect of  
482 doubling the sequence coverage on mutation rates. All analyses were carried out twice,  
483 once before the increase in coverage of the two samples, and once after the increase in

484 coverage. This increase in coverage did not affect the recovery of CNVs, nor the  
485 estimated mutation rate of single nucleotides (Flynn et al. 2017).

486

#### 487 *Small-scale variant calling*

488 Single nucleotide mutations and INDELs were called using GATK v.3.3.0  
489 (McKenna et al. 2010), first using HaplotypeCaller to assign putative genotypes for each  
490 individual separately, followed by GenotypeGVCFs to refine variant calling over all  
491 samples simultaneously. Variants were filtered using GATK based on various quality  
492 and alignment metrics including variant quality, mapping quality, and strand bias (QD<2,  
493 QUAL<50, FS>60, MQ<40, MQRankSum<-12.5, ReadPosRankSum<-8 for single  
494 nucleotide mutations, and QD<2, QUAL<50, FS>200, ReadPosRankSum<-20 for  
495 INDELs). To further prevent false positive variant calls from the sequencing data, we  
496 excluded non-nuclear sites, repeat masked regions, sites without read coverage from  
497 each sample, and regions with overall depth lower than expected (average 6x) or  
498 greater than twice the expected coverage (average 26x). These filtering steps were  
499 informed by both follow-up inspection of mapped reads in a genome browser and  
500 Sanger sequencing of single nucleotide mutations and INDELs called at various filtering  
501 stages and with different read depths as described in Flynn *et al.* (2017). We retained  
502 ~25% of the reference genome as callable sites for identifying single nucleotide  
503 mutations and INDELs. As expected, all MA lines had unique mutation profiles despite  
504 allowing shared mutations among lines. We did not identify shared single nucleotide  
505 mutations across MA lines or any signature of potential contamination across lines  
506 propagated in isolation. The raw sequence data can be found in SRA (PRJNA341529).

507

#### 508 *Large deletions and duplications*

509 Four different CNV detection programs were initially run for determining putative  
510 deletions and duplications utilizing read depth, split-read and/or paired-end approaches.  
511 Read depth analysis was performed using CNVnator v0.3 (Abyzov et al. 2011) with a bin  
512 size of 500bp to uncover putative deletions and duplications for each sample compared  
513 to the reference genome. Another read depth approach called CNV-seq v0.2-8 (Xie and  
514 Tammi 2009) was used that compares pairwise samples. CNV-seq was run using a

515 sliding 250bp window on every pairwise comparison between MA lines (i.e. all pairwise  
516 combinations among the 51 *Con*, *Ni*, *Cu*, and *NiCu* samples), and between each non-  
517 MA isolate and every MA line (but not non-MA isolates with one another since they can  
518 share CNVs by descent). CNVs were called if four consecutive windows had a  $\log_2$   
519 depth of coverage difference above 0.44 or below 0.6, which requires a coverage ratio  
520  $>1.36$  or  $<0.66$  respectively. CNVs detected in every pairwise comparison were  
521 identified for each sample, followed by the merging of CNVs within 10kb of one another  
522 to represent a single CNV, to overcome the majority of assembly gaps and repetitive  
523 regions (Keith et al. 2016). Paired-end read mapping and soft-clipped split-reads were  
524 also used to infer structural variants using SoftSV v1.4 (Bartenhagen and Dugas 2016).  
525 Because paired reads of short fragments overlap one another, inhibiting the ability to  
526 detect CNVs, SoftSV was also analyzed after trimming all reads to 50bp. Trimming the  
527 ends of paired reads can theoretically permit independent mapping of each paired read  
528 by removing overlapping sequences, thereby improving chances of detecting CNVs. In  
529 addition to the three tools mentioned above, we used a simple in-house read depth  
530 approach to estimate CNVs among genes in individual lines as follows. For each gene  
531 from each sample, read depth was standardized by the total read depth of the  
532 respective sample to enable comparisons across lines, and read depth was centered to  
533 2 to approximate diploid copy numbers. We compared all MA lines with one another and  
534 with non-MA isolates using the deviation of normalized read depth among samples to  
535 identify candidate gene duplications and gene deletions. At a diploid locus, we would  
536 expect mutants with a deletion to have at least half as much coverage as non-mutant  
537 lines, and mutants with a duplication to have at least twice as much coverage as non-  
538 mutant lines. Due to variability in read depth coverage, we used slightly less stringent  
539 thresholds while still requiring mutants to be outliers based on 1.5x interquartile ranges.  
540 Genes were considered as deleted if the MA line with the lowest standardized read  
541 depth was  $< 0.66x$  compared to all other MA lines, while being an outlier with at least  
542 0.5 fewer absolute copies. Genes were considered as duplicated if the MA line with the  
543 highest standardized read depth was  $> 1.4x$  compared to all other MA lines, while being  
544 an outlier with at least 0.5 more absolute copies. Based on the overlaps of CNVs  
545 detected from all four methods, CNV-seq had an overwhelmingly higher proportion of

546 gene CNVs overlapping our read depth method (up to 10 fold more than both CNVnator  
547 and SoftSV), and also shared the highest proportion of pairwise concordant CNVs  
548 among the 3 implemented tools. Combined with the fact that CNV-seq was also used in  
549 a recent analysis among other *Daphnia* MA lines and had high validation rates (Keith et  
550 al. 2016), we decided to solely rely on the results of CNV-seq. To evaluate the effects of  
551 sample size on CNV detection, we repeated our CNV analyses and rate estimates using  
552 random sampling of 5, 10, 20, 30 and 40 genomes. Whereas absolute rate estimates  
553 differed, the relative rates between treatments were not affected.

554 To identify CNVs shared by descent as well as mutation hotspots, we allowed  
555 overlapping (shared) CNVs among samples (e.g. two samples with deletions versus all  
556 other samples but not between one another). However, we did not allow shared  
557 mutations to occur in more than 50% of lines, which could be due to differences  
558 between the ancestor and the reference genome. Overlapping CNVs in non-MA isolates  
559 were interpreted as shared by descent, and shared CNVs among MA lines were  
560 considered as recurrent CNVs (potentially hotspots). CNVs with an average depth of  
561 coverage below 6x were removed. Protein-coding genes that intersected with remaining  
562 duplications or deletions (with a minimum 5% of their length) were considered as  
563 putative gene CNVs (>95% length overlap were considered as “complete” gene CNVs  
564 as opposed to partial gene CNVs).

565

#### 566 *Mutation validations*

567 Sanger sequencing of randomly selected single nucleotide mutations and  
568 INDELs confirmed 21 out of 25 mutations as described in Flynn *et al.* (2017). Long-  
569 range PCR amplification of CNVs was performed to validate the presence or absence of  
570 large-scale mutations in the putative mutant sample and two other independent MA  
571 lines. Primer pairs were designed based on the ancestral progenitor’s sequence around  
572 inferred breakpoints from randomly selected CNV loci, in addition to one CNV  
573 overlapping the *mre11* gene, two CNVs found in multiple samples, and five CNVs that  
574 were excluded after filtering (Supplemental Table S4). Our PCR approach successfully  
575 verified 12 out of 14 CNV tests, and confirmed all (4 out of 4) putative CNVs that were

576 called with fewer samples (but not detected after increasing the number of sample  
577 comparisons) were false positives.

578

#### 579 *CNV rate calculation*

580 Duplications and deletions were evaluated using only the scaffolds that contained  
581 one of the 10,673 “single-copy” protein-coding genes in *Daphnia* to reduce the impact of  
582 mis-mapping against the highly duplicated reference genome (Colbourne et al. 2011; Keith  
583 et al. 2016). Single-copy genes were determined as genes without any duplicates in the  
584 *Daphnia* reference genome by identifying paralogs using EnsemblMetazoa v30. The  
585 number of sites kept for analysis and used to calculate mutation rates was  
586 113,196,346bp (57% of the reference genome), with 8,699 single-copy protein-coding  
587 genes found on 1,313 scaffolds. CNVs that had an average coverage below 6x across  
588 all samples were removed. The duplication and deletion rates per genome were  
589 estimated using the formula  $\mu = n / T$ , where  $n$  equals the number of duplication or  
590 deletion events and  $T$  is the number of generations that a sample was propagated.  
591 Since all samples are compared over the same genomic regions, these rates can be  
592 used to compare treatments. CNV rates per genome per nucleotide were compared  
593 across studies and were calculated using  $\mu = n / (2 \times L \times T)$ , in which  $L$  is the total  
594 number of loci (nucleotides) analyzed. For mutation rates of gene duplications and  
595 deletions,  $n$  was the number of gene CNVs and  $L$  was the number of single-copy  
596 protein-coding genes analyzed as mentioned above.

597 The nine non-MA isolates were sampled at two time points: six when MA *Con*  
598 lines reached an average of 101 generations (1,368 days), and three more when MA  
599 *Con* lines reached an average of 136 generations (1,642 days). Due to potentially  
600 overlapping generations, the non-MA population likely achieved lower mean  
601 generations than MA-lines. To estimate the average number of generations, ten non-MA  
602 isolates and ten *Con* MA lines with seven replicate offspring from each focal mother  
603 were used in a life history experiment (Supplemental Methods). The average generation  
604 time of the population was estimated based on the mean age at first reproduction and  
605 longevity, and weighted by average clutch sizes. To compare realized rates of CNVs in  
606 the non-MA population that has likely faced greater selective pressures than the MA

607 lines, we calculated the realized mutation rates taking into account the genealogy and  
608 shared mutations among lineages (Supplemental Methods). Moreover, we used a range  
609 of generations in the denominator to represent propagation rates up to five times slower  
610 relative to MA lines (i.e. relative propagation rates from 0.2 to 1), encompassing the  
611 average and lower bound generation estimates.

612

### 613 *Breakpoint detection and deletion formation mechanisms*

614 Breakpoint analysis of CNVs was performed to infer the molecular mechanism of  
615 deletion formation. This approach compares the nucleotide sequences surrounding the  
616 ends (breakpoints) of CNVs with expected genomic signatures of different CNV  
617 formation mechanisms, including the identification of transposable elements, repeats,  
618 low-complexity DNA motifs, and sequence identity across breakpoint junctions (Lam et  
619 al. 2010). For each deletion, reads that mapped around putative breakpoint boundaries  
620 were assembled using TigrasV v0.4 (Chen et al. 2014). Assembled contigs were then re-  
621 aligned to the reference to define breakpoints using AGEv0.4 (Abyzov and Gerstein 2011).  
622 Filtering was performed to assign breakpoints with high confidence based on the  
623 comparison between the sequence alignment and the predicted deletion region; contig  
624 alignments were required to have at least 95% sequence identity including flanking  
625 regions, as well being within 4kb of the estimated breakpoint ranges from CNV-seq and  
626 overlapping at least 50% of the estimated range. When multiple alternative breakpoints  
627 were found, we selected the ones closest to the estimated range. Breakpoints were  
628 estimated for each CNV, and deletion formation mechanisms (such as NHR) were  
629 inferred for 43% of deletions using BreakSeq v1.3 (Lam et al. 2010) as well as the DNA  
630 flexibility, DNA helix stability, and GC content at breakpoints.

631

### 632 **Data access**

633 The genome sequence data for all samples have been deposited in the Sequence Read  
634 Archive (SRA) under accession PRJNA341529.

635

### 636 **Acknowledgments**



637 We thank all the students that contributed to maintaining the MA lines over the past five  
638 years. Thanks to T. Crease, D. Denver, B. Fryer, D. Haffner, R. Vergilino, K. Millette, N.  
639 Yan, J. Witt, G. Zhang and M. Dutton for helpful suggestions during the project.

640

#### 641 **Author contributions**

642 FJJC and MEC conceived and designed the project. JMF and JKB prepared the  
643 samples for sequencing. JMF and FJJC designed the analytical approach and  
644 performed the PCR validations. JKB performed the life history experiment. FJJC  
645 analyzed the data and wrote the paper. All authors contributed to and approved the final  
646 manuscript. This project was supported by an NSERC CREATE fellowship to FJJC, an  
647 NSERC scholarship to JMF, and an NSERC CREATE training program on Aquatic  
648 Ecosystem Health, an NSERC Discovery Grant, and Canada Research Chair to MEC.

649

#### 650 **References**

- 651 Abyzov A, Gerstein M. 2011. AGE: defining breakpoints of genomic structural variants  
652 at single-nucleotide resolution, through optimal alignments with gap excision.  
653 *Bioinformatics* **27**: 595–603.
- 654 Abyzov A, Urban AE, Snyder M, Gerstein M. 2011. CNVnator: An approach to discover,  
655 genotype, and characterize typical and atypical CNVs from family and population  
656 genome sequencing. *Genome Res* **21**: 974–984.
- 657 Adewoye AB, Lindsay SJ, Dubrova YE, Hurles ME. 2015. The genome-wide effects of  
658 ionizing radiation on mutation induction in the mammalian germline. *Nat Commun* **6**:  
659 6684.
- 660 Altshuler I, Demiri B, Xu S, Constantin A, Yan ND, Cristescu ME. 2011. An integrated  
661 multi-disciplinary approach for studying multiple stressors in freshwater ecosystems:  
662 *Daphnia* as a model organism. *Integrative and Comparative Biology* **51**: 623–633.
- 663 Baer CF, Miyamoto MM, Denver DR. 2007. Mutation rate variation in multicellular  
664 eukaryotes: causes and consequences. *Nat Rev Genet* **8**: 619–631.
- 665 Baer CF, Shaw F, Steding C, Baumgartner M, Hawkins A, Houppert A, Mason N, Reed  
666 M, Simonelic K, Woodard W, et al. 2005. Comparative evolutionary genetics of  
667 spontaneous mutations affecting fitness in rhabditid nematodes. *Proc Natl Acad Sci*  
668 *USA* **102**: 5785–5790.
- 669 Bartenhagen C, Dugas M. 2016. Robust and exact structural variation detection with  
670 paired-end and soft-clipped alignments: SoftSV compared with eight algorithms.

- 671 *Briefings in Bioinformatics* **17**: 51–62.
- 672 Baym M, Kryazhimskiy S, Lieberman TD, Chung H, Desai MM, Kishony R. 2015.  
673 Inexpensive multiplexed library preparation for megabase-sized genomes. *PLoS*  
674 *ONE* **10**: e0128036. DOI: [10.1371/journal.pone.0128036](https://doi.org/10.1371/journal.pone.0128036)
- 675 Cardoso-Moreira M, Arguello JR, Clark AG. 2012. Mutation spectrum of *Drosophila*  
676 CNVs revealed by breakpoint sequencing. *Genome Biol* **13**: R119.
- 677 Carvalho CMB, Lupski JR. 2016. Mechanisms underlying structural variant formation in  
678 genomic disorders. *Nat Rev Genet* **17**: 224–238.
- 679 Chen K, Chen L, Fan X, Wallis J, Ding L, Weinstock G. 2014. TIGRA: a targeted  
680 iterative graph routing assembler for breakpoint assembly. *Genome Res* **24**: 310–  
681 317.
- 682 Ciccia A, Elledge SJ. 2010. The DNA damage response: making it safe to play with  
683 knives. *Molecular Cell* **40**: 179–204.
- 684 Colbourne JK, Pfrender ME, Gilbert D, Thomas WK, Tucker A, Oakley TH, Tokishita S,  
685 Aerts A, Arnold GJ, Basu MK, et al. 2011. The ecoresponsive genome of *Daphnia*  
686 *pulex*. *Science* **331**: 555–561.
- 687 DeBolt S. 2010. Copy number variation shapes genome diversity in Arabidopsis over  
688 immediate family generational scales. *Genome Biology and Evolution* **2**: 441–453.
- 689 Doyle JJ, Doyle JL. 1987. A rapid DNA isolation procedure for small quantities of fresh  
690 leaf tissue. *Phytochemical Bulletin* **19**: 11–15.
- 691 Flynn JM, Chain FJJ, Schoen DJ, Cristescu ME. 2017. Spontaneous mutation  
692 accumulation in *Daphnia pulex* in selection-free vs. competitive environments. *Mol*  
693 *Biol Evol* **34**: 160–173.
- 694 Goho S, Bell G. 2000. Mild environmental stress elicits mutations affecting fitness in  
695 *Chlamydomonas*. *Proc R Soc B* **267**: 123–129.
- 696 Gu W, Zhang F, Lupski JR. 2008. Mechanisms for human genomic rearrangements.  
697 *Pathogenetics* **1**: 4.
- 698 Halligan DL, Keightley PD. 2009. Spontaneous mutation accumulation studies in  
699 evolutionary genetics. *Annu Rev Ecol Evol Syst* **40**: 151–172.
- 700 Helleday T, Eshtad S, Nik-Zainal S. 2014. Mechanisms underlying mutational  
701 signatures in human cancers. *Nat Rev Genet* **15**: 585–598.
- 702 Jiang C, Mithani A, Belfield EJ, Mott R, Hurst LD, Harberd NP. 2014. Environmentally  
703 responsive genome-wide accumulation of de novo *Arabidopsis thaliana* mutations  
704 and epimutations. *Genome Res* **24**: 1821–1829.

- 705 Joyner-Matos J, Bean LC, Richardson HL, Sammeli T, Baer CF. 2011. No evidence of  
706 elevated germline mutation accumulation under oxidative stress in *Caenorhabditis*  
707 *elegans*. *Genetics* **189**: 1439–1447.
- 708 Keith N, Tucker AE, Jackson CE, Sung W, Lucas Lledó JI, Schrider DR, Schaack S,  
709 Dudycha JL, Ackerman M, Younge AJ, et al. 2016. High mutational rates of large-  
710 scale duplication and deletion in *Daphnia pulex*. *Genome Res* **26**: 60–69.
- 711 Lam HYK, Mu XJ, Stütz AM, Tanzer A, Cayting PD, Snyder M, Kim PM, Korbel JO,  
712 Gerstein MB. 2010. Nucleotide-resolution analysis of structural variants using  
713 BreakSeq and a breakpoint library. *Nature Biotechnol* **28**: 47–55.
- 714 Langie SAS, Koppen G, Desaulniers D, Al-Mulla F, Al-Temaimi R, Amedei A, Azqueta  
715 A, Bisson WH, Brown DG, Brunborg G, et al. 2015. Causes of genome instability:  
716 the effect of low dose chemical exposures in modern society. *Carcinogenesis* **36**  
717 **Suppl 1**: S61–88.
- 718 Li H, Durbin R. 2009. Fast and accurate short read alignment with Burrows-Wheeler  
719 transform. *Bioinformatics* **25**: 1754–1760.
- 720 Lipinski KJ, Farslow JC, Fitzpatrick KA, Lynch M, Katju V, Bergthorsson U. 2011. High  
721 spontaneous rate of gene duplication in *Caenorhabditis elegans*. *Curr Biol* **21**: 306–  
722 310.
- 723 Lynch M. 2016. Mutation and human exceptionalism: our future genetic load. *Genetics*  
724 **202**: 869–875.
- 725 Lynch M. 2010. Rate, molecular spectrum, and consequences of human mutation. *Proc*  
726 *Natl Acad Sci USA* **107**: 961–968.
- 727 Lynch M, Sung W, Morris K, Coffey N, Landry CR, Dopman EB, Dickinson WJ,  
728 Okamoto K, Kulkarni S, Hartl DL, et al. 2008. A genome-wide view of the spectrum  
729 of spontaneous mutations in yeast. *Proc Natl Acad Sci USA* **105**: 9272–9277.
- 730 Marchetti F, Rowan-Carroll A, Williams A, Polyzos A, Berndt-Weis ML, Yauk CL. 2011.  
731 Sidestream tobacco smoke is a male germ cell mutagen. *Proc Natl Acad Sci USA*  
732 **108**: 12811–12814.
- 733 Matsuba C, Ostrow DG, Salomon MP, Tolani A, Baer CF. 2013. Temperature, stress  
734 and spontaneous mutation in *Caenorhabditis briggsae* and *Caenorhabditis elegans*.  
735 *Biology Letters* **9**: 20120334.
- 736 McKenna A, Hanna M, Banks E, Sivachenko A, Cibulskis K, Kernytsky A, Garimella K,  
737 Altshuler D, Gabriel S, Daly M, et al. 2010. The Genome Analysis Toolkit: a  
738 MapReduce framework for analyzing next-generation DNA sequencing data.  
739 *Genome Res* **20**: 1297–1303.
- 740 Morales ME, Derbes RS, Ade CM, Ortego JC, Stark J, Deininger PL, Roy-Engel AM.

- 741 2016. Heavy metal exposure influences double strand break DNA repair outcomes.  
742 *PLoS ONE* **11**: e0151367. DOI: [10.1371/journal.pone.0151367](https://doi.org/10.1371/journal.pone.0151367)
- 743 Ness RW, Morgan AD, Vasanthakrishnan RB, Colegrave N, Keightley PD. 2015.  
744 Extensive de novo mutation rate variation between individuals and across the  
745 genome of *Chlamydomonas reinhardtii*. *Genome Res* **25**: 1739–1749.
- 746 Omilian AR, Cristescu MEA, Dudycha JL, Lynch M. 2006. Ameiotic recombination in  
747 asexual lineages of *Daphnia*. *Proc Natl Acad Sci USA* **103**: 18638–18643.
- 748 Ponder RG, Fonville NC, Rosenberg SM. 2005. A switch from high-fidelity to error-  
749 prone DNA double-strand break repair underlies stress-induced mutation. *Molecular*  
750 *Cell* **19**: 791–804.
- 751 Rass E, Grabarz A, Plo I, Gautier J, Bertrand P, Lopez BS. 2009. Role of Mre11 in  
752 chromosomal nonhomologous end joining in mammalian cells. *Nat Struct Mol Biol*  
753 **16**: 819–824.
- 754 Rodgers K, McVey M. 2016. Error-prone repair of DNA double-strand breaks. *J Cell*  
755 *Physiol* **231**: 15–24.
- 756 Rogstad SH, Keane B, Collier MH. 2003. Minisatellite DNA mutation rate in dandelions  
757 increases with leaf-tissue concentrations of Cr, Fe, Mn, and Ni. *Environ Toxicol*  
758 *Chem* **22**: 2093–2099.
- 759 Schrider DR, Houle D, Lynch M, Hahn MW. 2013. Rates and genomic consequences of  
760 spontaneous mutational events in *Drosophila melanogaster*. *Genetics* **194**: 937–  
761 954.
- 762 Sharp NP, Agrawal AF. 2016. Low genetic quality alters key dimensions of the  
763 mutational spectrum. *PLoS Biol* **14**: e1002419. DOI: [10.1371/journal.pbio.1002419](https://doi.org/10.1371/journal.pbio.1002419)
- 764 Singh SK, Roy S, Choudhury SR, Sengupta DN. 2010. DNA repair and recombination in  
765 higher plants: insights from comparative genomics of *Arabidopsis* and rice. *BMC*  
766 *Genomics* **11**: 443.
- 767 Somers CM, Yauk CL, White PA, Parfett CLJ, Quinn JS. 2002. Air pollution induces  
768 heritable DNA mutations. *Proc Natl Acad Sci USA* **99**: 15904–15907.
- 769 Sudmant PH, Rausch T, Gardner EJ, Handsaker RE, Abyzov A, Huddleston J, Zhang  
770 Y, Ye K, Jun G, Hsi-Yang Fritz M, et al. 2015. An integrated map of structural  
771 variation in 2,504 human genomes. *Nature* **526**: 75–81.
- 772 Wang AD, Agrawal AF. 2012. DNA repair pathway choice is influenced by the health of  
773 *Drosophila melanogaster*. *Genetics* **192**: 361–370.
- 774 Xie C, Tammi MT. 2009. CNV-seq, a new method to detect copy number variation using  
775 high-throughput sequencing. *BMC Bioinformatics* **10**: 80.

- 776 Xu S, Omilian AR, Cristescu ME. 2011. High rate of large-scale hemizygous deletions in  
777 asexually propagating *Daphnia*: implications for the evolution of sex. *Mol Biol Evol*  
778 **28**: 335–342.
- 779 Yan ND, Bailey J, McGeer JC, Manca MM, Keller WB, Celis-Salgado MP, Gunn JM.  
780 2016. Arrive, survive and thrive: essential stages in the re-colonization and recovery  
781 of zooplankton in urban lakes in Sudbury, Canada. *J Limnol* **75**: 4–14.
- 782 Yao Y, Kovalchuk I. 2011. Abiotic stress leads to somatic and heritable changes in  
783 homologous recombination frequency, point mutation frequency and microsatellite  
784 stability in *Arabidopsis* plants. *Mutation Research - Fundamental and Molecular*  
785 *Mechanisms of Mutagenesis* **707**: 61–66.
- 786 Yauk C, Polyzos A, Rowan-Carroll A, Somers CM, Godschalk RW, Van Schooten FJ,  
787 Berndt ML, Pogribny IP, Koturbash I, Williams A, et al. 2008. Germ-line mutations,  
788 DNA damage, and global hypermethylation in mice exposed to particulate air  
789 pollution in an urban/industrial location. *Proc Natl Acad Sci USA* **105**: 605–610.
- 790 Zichner T, Garfield DA, Rausch T, Stutz AM, Cannavo E, Braun M, Furlong EEM,  
791 Korb J. 2013. Impact of genomic structural variation in *Drosophila melanogaster*  
792 based on population-scale sequencing. *Genome Res* **23**: 568–579.
- 793
